# Supplementary material for: Biotransformation of American Ginseng Stems and Leaves by an Endophytic Fungus Umbelopsis sp. and Its Effect on Alzheimer’s Disease Control
Source: MDPI journal article supplement (doi:10.3390/nu15234878), 2023-11-22
Supplement: s1 [file s1]

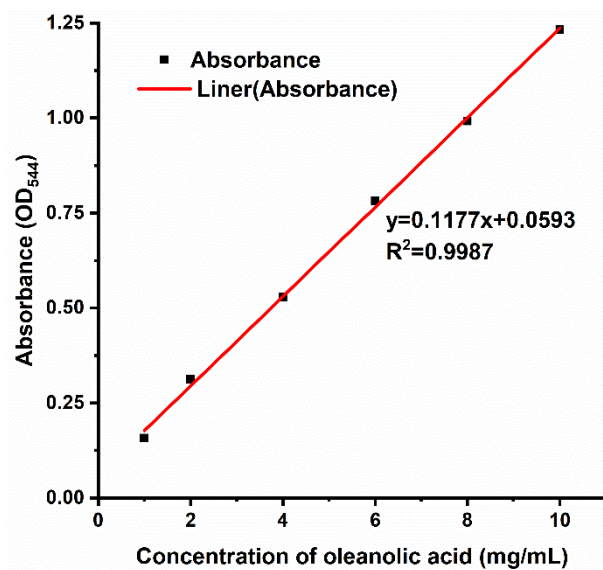

**Figure S1.** Standard curve for concentration of total saponin.

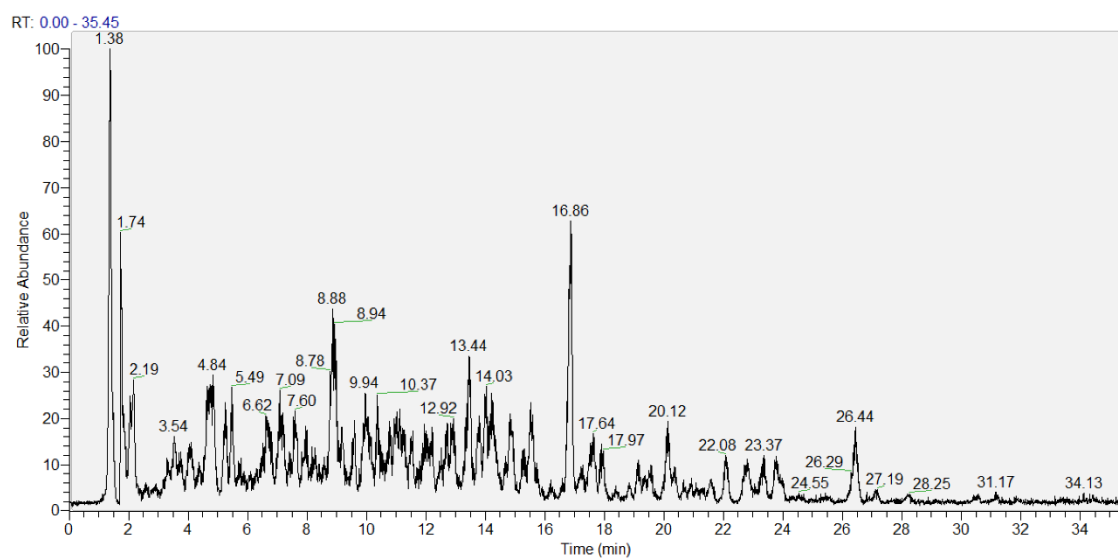

**Figure S2.** TIC of LC/MS determination by CK-SL.

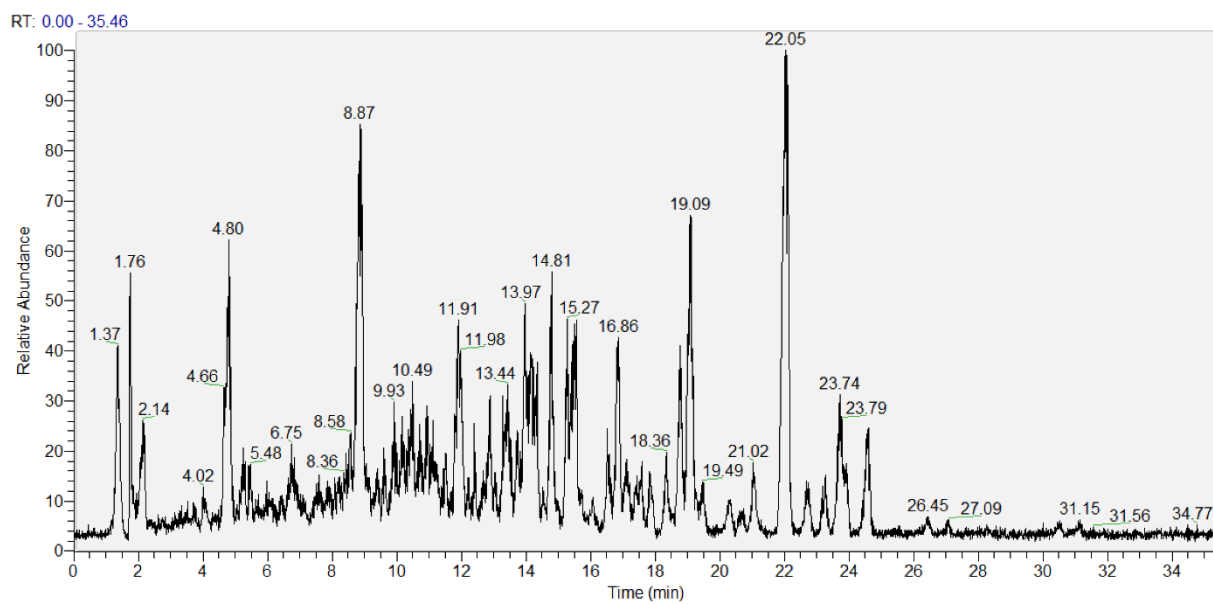

**Figure S3.** TIC of LC/MS determination by G-SL.

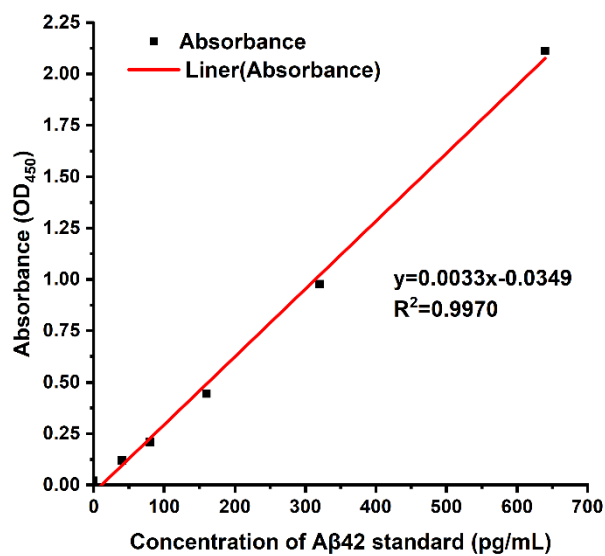

**Figure S4.** Standard curve for concentration of Aβ42.

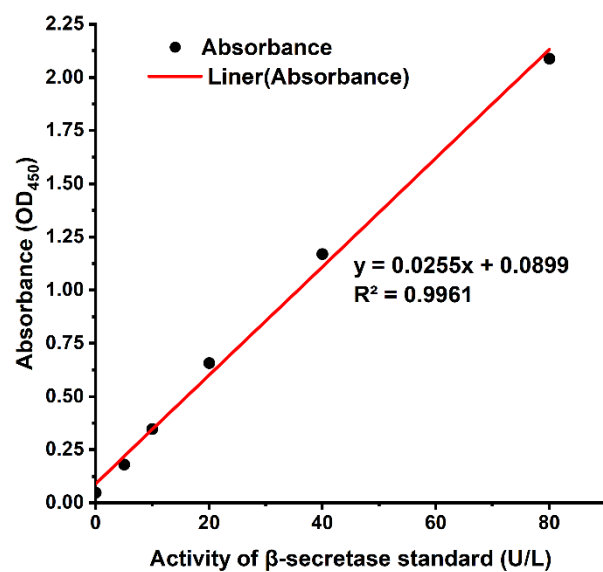

**Figure S5.** Standard curve for activity of  $\beta$ -secretas.
